# Supplementary material for: Interface engineering improves the performance of green perovskite light-emitting diodes
Source: Royal Society of Chemistry journal article supplement (doi:10.1039/d1tc05706e), 2022-01-01
Supplement: d1tc05706e1.pdf [file d1tc05706e1.pdf]

## Electronic Supplementary Information

### Interface Engineering Improves the Performance of Green Perovskite Light-emitting Diodes

Ming-Lei Guo,<sup>a</sup> Yu Lu,<sup>a</sup> Xiao-Yi Cai,<sup>a</sup> Yang Shen,<sup>a</sup> Xiao-Yan Qian,<sup>a</sup> Hao Ren,<sup>a</sup> Yan-Qing Li,<sup>\*b</sup> Wen-Jun Wang,<sup>c</sup> Jian-Xin Tang<sup>\*ad</sup>

<sup>a</sup> *Institute of Functional Nano & Soft Materials (FUNSOM), Jiangsu Key Laboratory for Carbon-Based Functional Materials & Devices, Soochow University, Suzhou 215123, China, E-mail: jxtang@suda.edu.cn (J.X. Tang)*

<sup>b</sup> *School of Physics and Electronic Science, Ministry of Education Nanophotonics and Advanced Instrument Engineering Research Center, East China Normal University, Shanghai 200062, China, E-mail: yqli@phy.ecnu.edu.cn (Y.Q. Li)*

<sup>c</sup> *School of Physical Science and Information Technology, Shandong Provincial Key Laboratory of Optical Communication Science and Technology, Liaocheng University, Shandong 252059, China*

<sup>d</sup> *Macao Institute of Materials Science and Engineering (MIMSE), Macau University of Science and Technology, Taipa 999078, Macau, China*

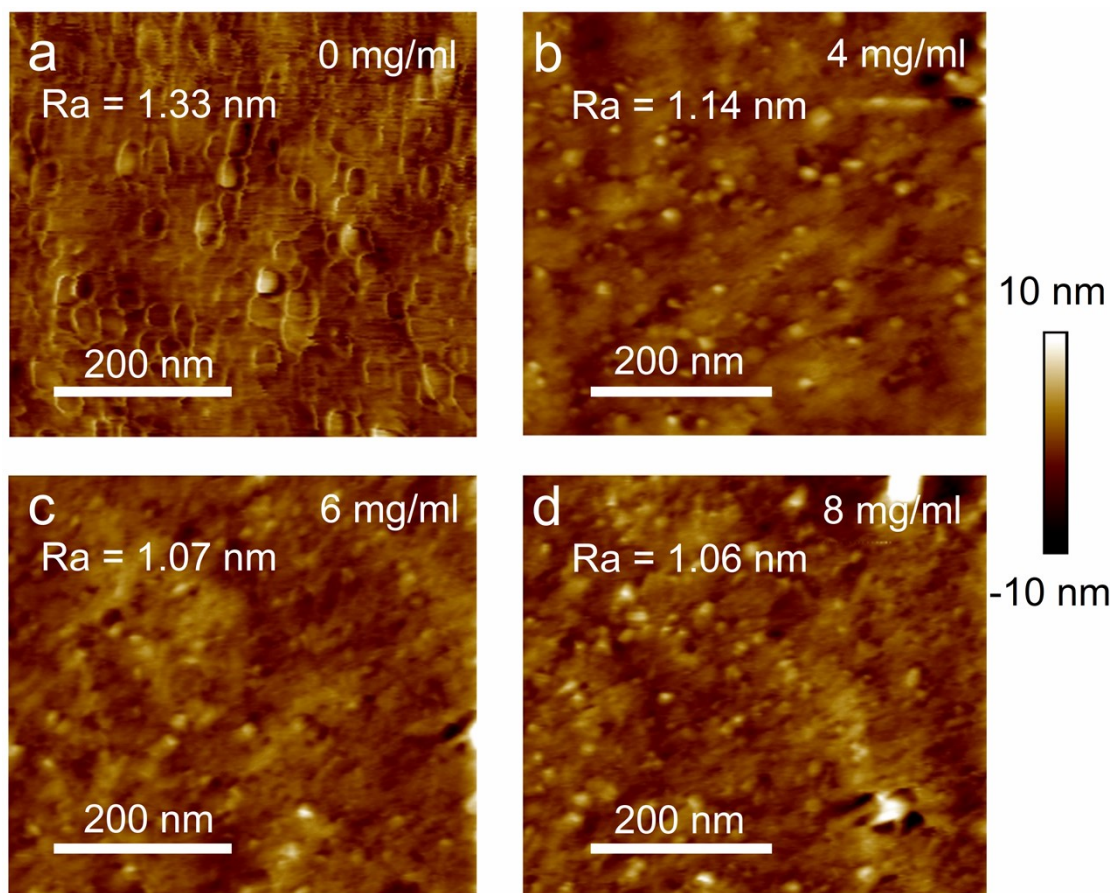

**Figure S1.** AFM images of the perovskite films grown on the PEDOT:PSS substrate mixed with various AT ratios.

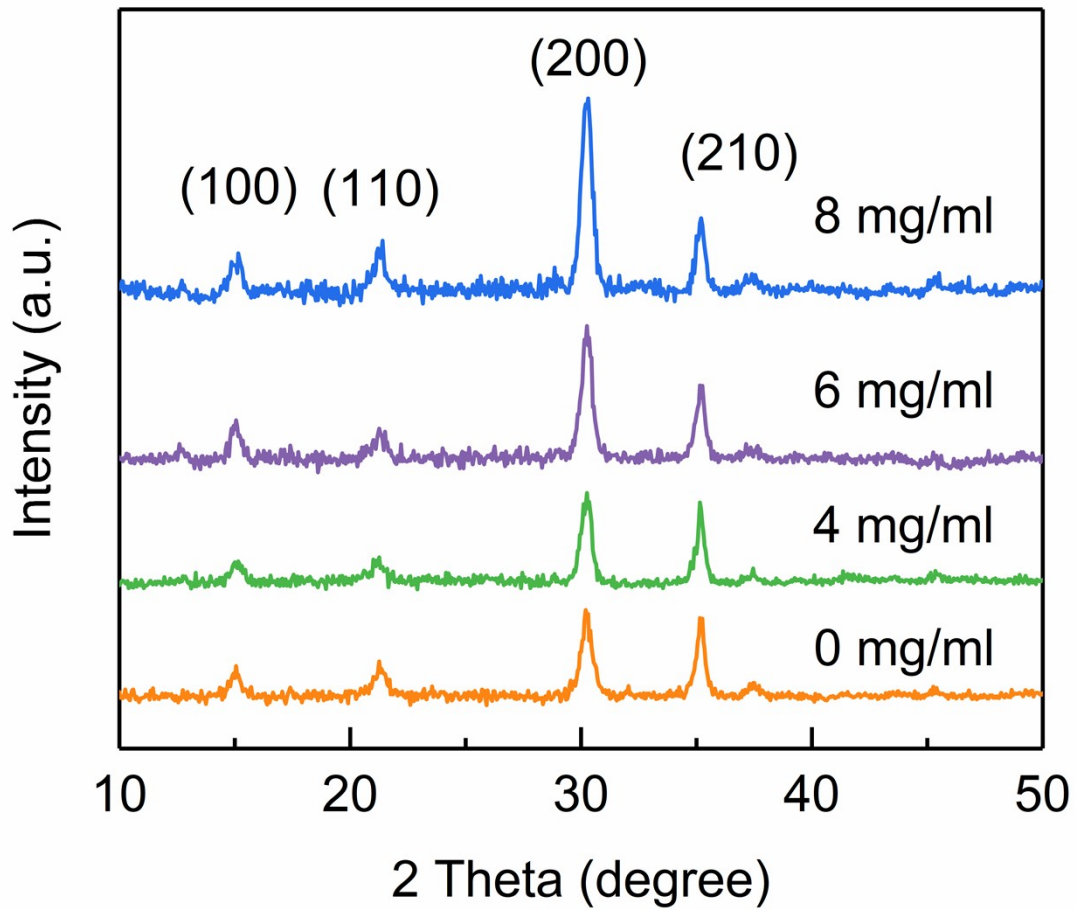

**Figure S2.** XRD patterns of perovskite films formed on the PEDOT:PSS substrate mixed with various ratios of AT. All the results were normalized by (210) peak.

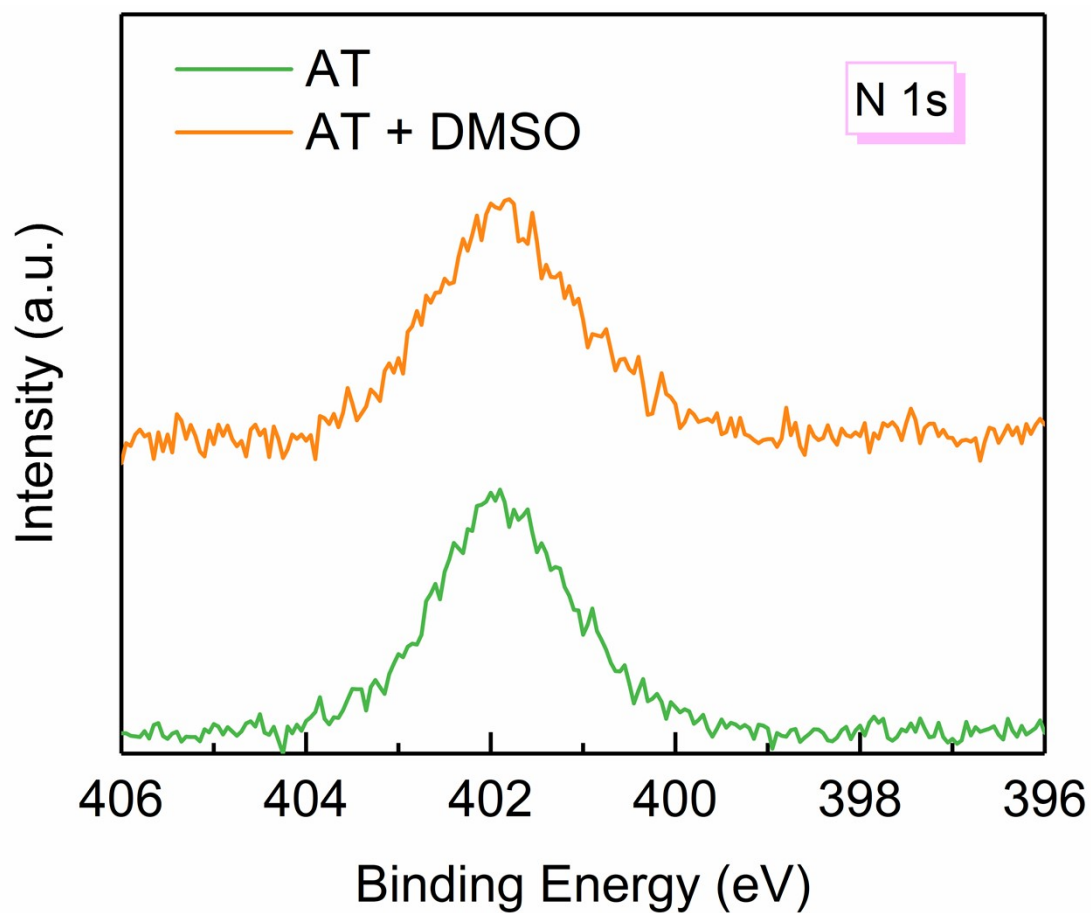

**Figure S3.** XPS results of the N 1s signal in AT-modified PEDOT:PSS and in AT-modified PEDOT:PSS after washing with DMSO solution.

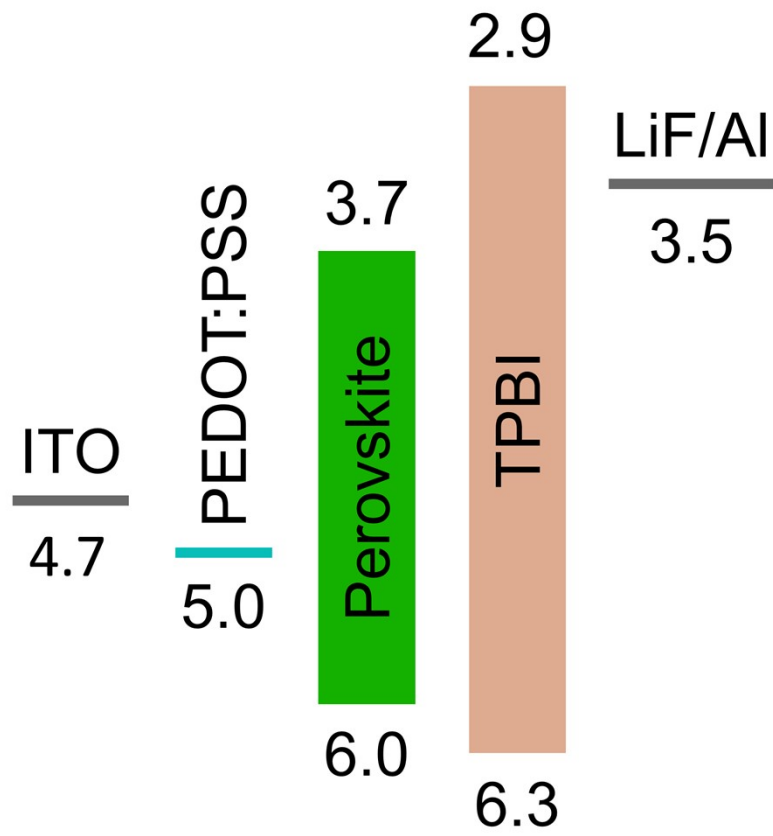

**Figure S4.** Energy level diagram of PeLEDs (unit: eV)

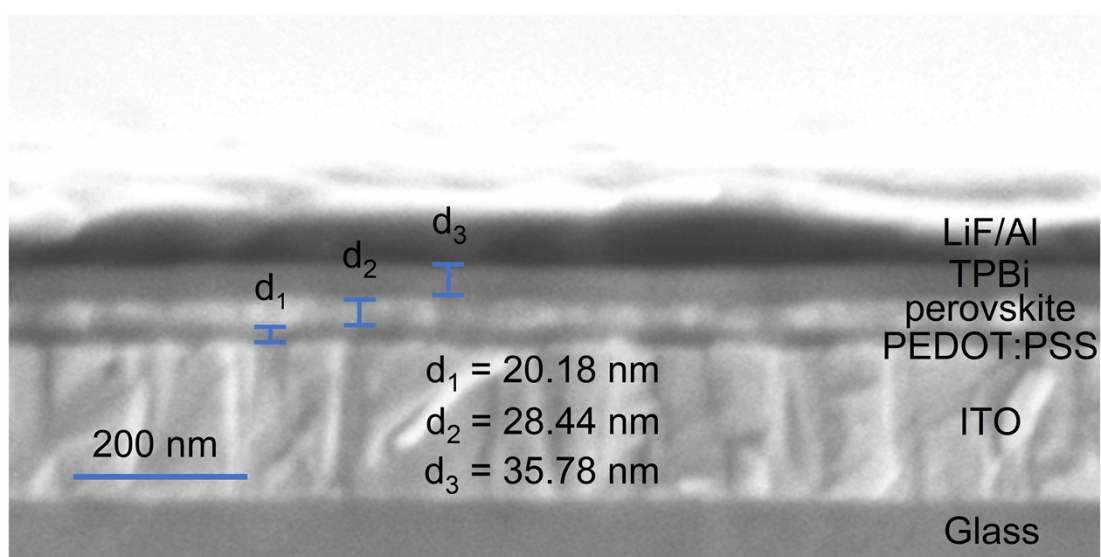

**Figure S5.** Cross-section SEM images of the PeLED. The thickness of the different functional layers is marked in the figure.

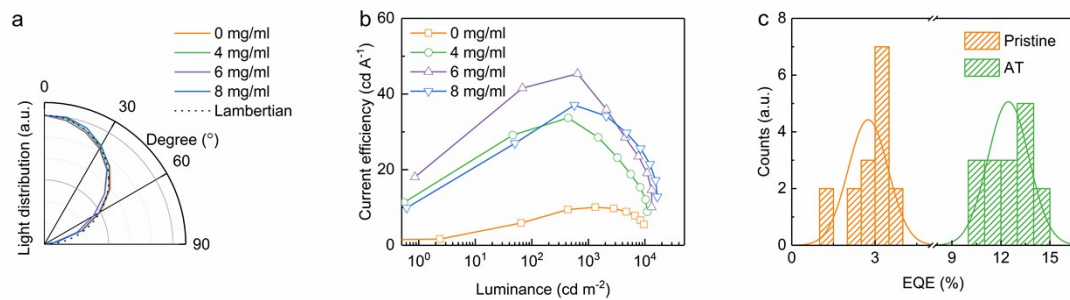

**Figure S6.** Device performance characteristics of PeLEDs formed on pristine and modified PEDOT:PSS substrates. (a) The angular dependence of the EL intensity. (b) Current efficiency-Luminescence curves. (c) Statistical graph of device performance.

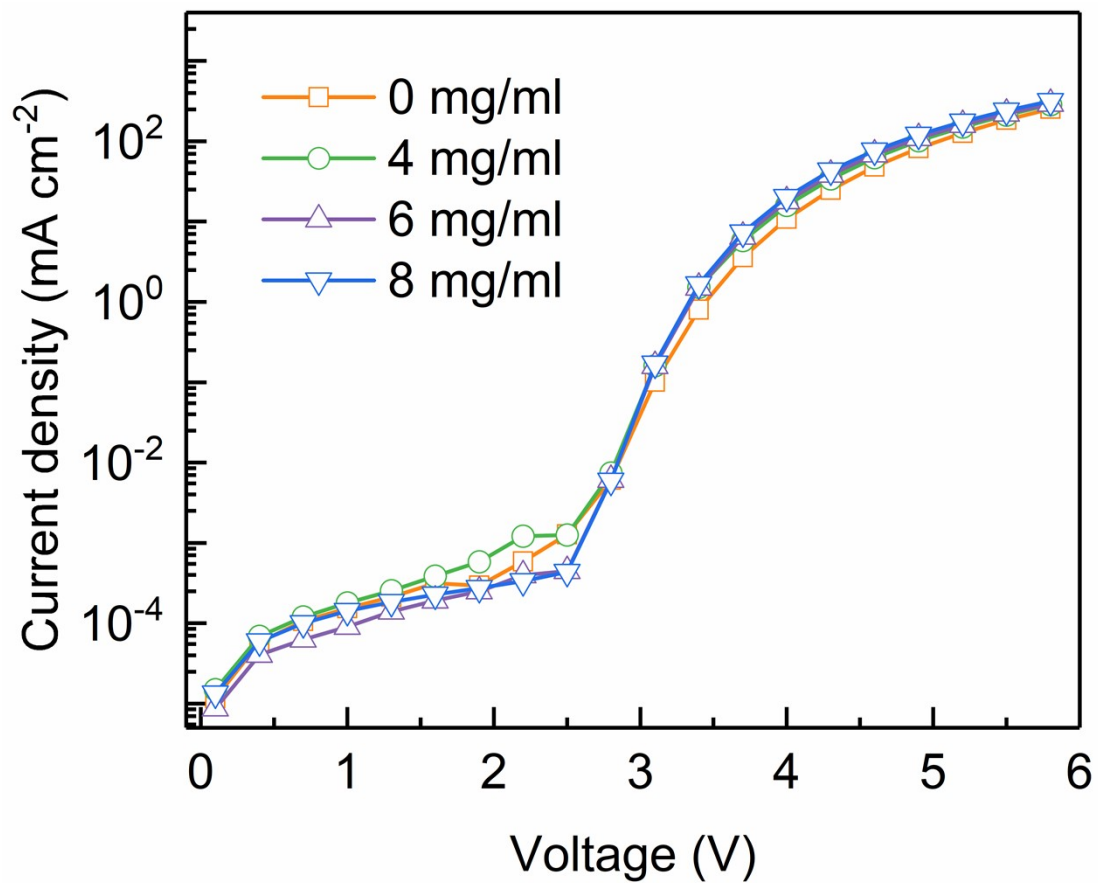

**Figure S7.** The J-V curves of PeLEDs under the voltage from 0.1 V to 5.8 V.



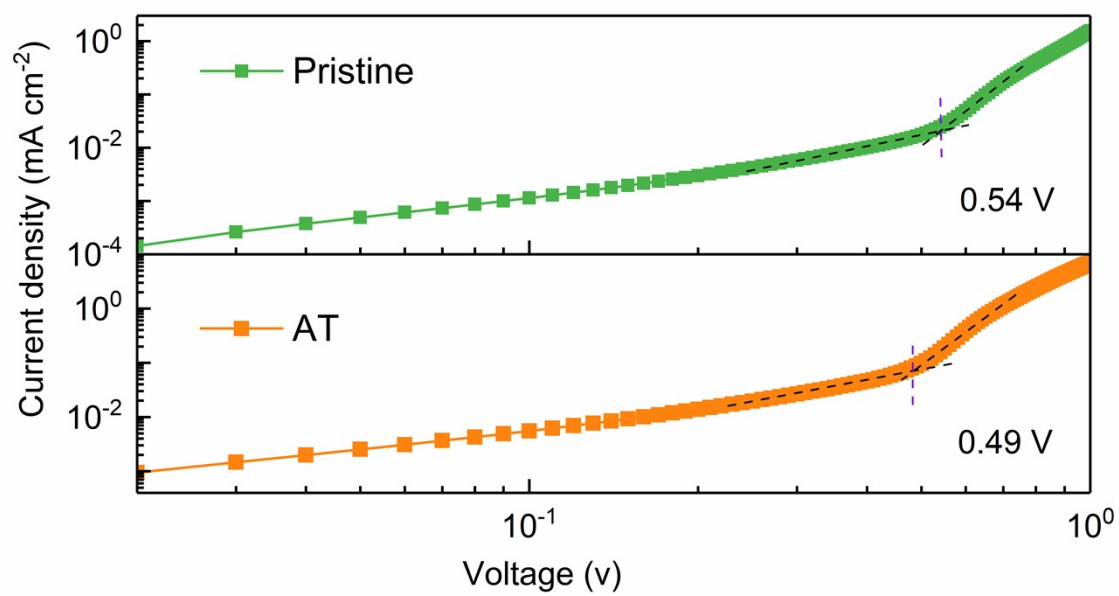

**Figure S8.** Current density-voltage curves of hole-only devices with a device architecture ITO/pristine or modified PEDOT:PSS/perovskite/MoOx/Ag.

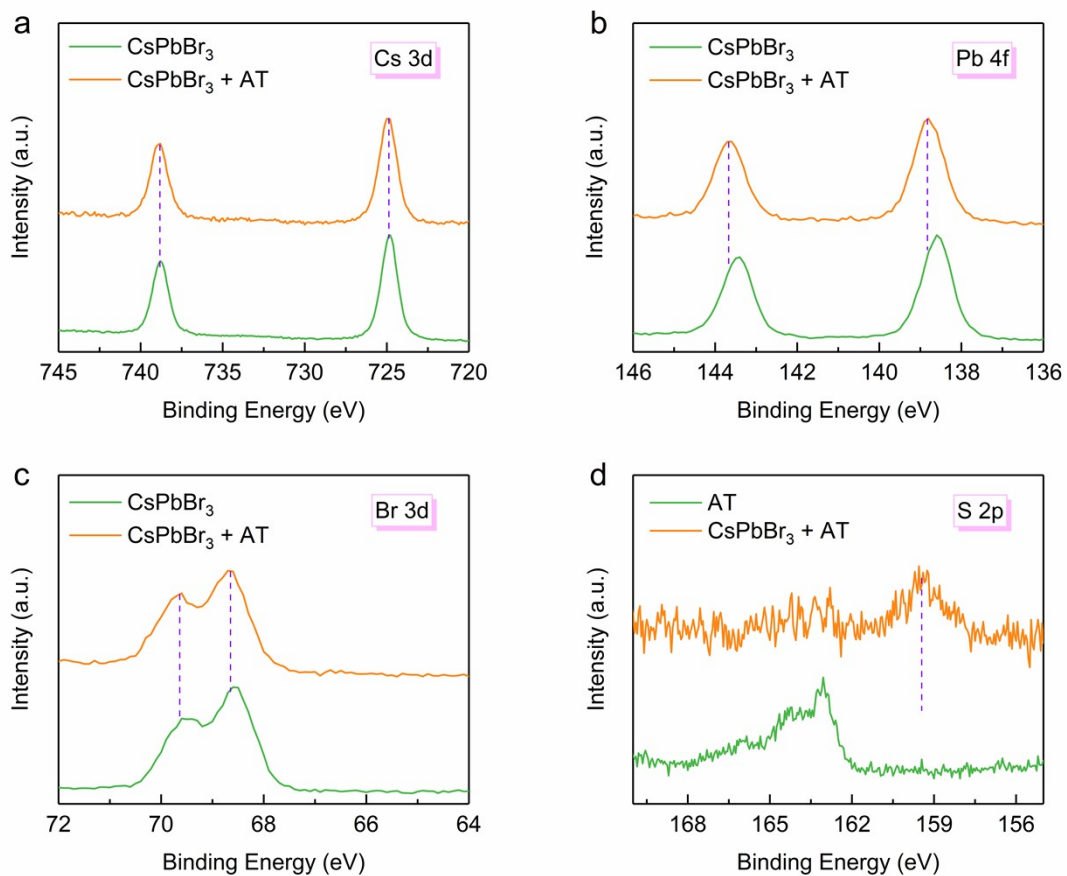

**Figure S9.** (a-c) XPS survey of Cs 3d, Pb 4f and Br 3d for the pristine and AT-doped CsPbBr<sub>3</sub> perovskite. (d) XPS results of S 2p for AT and CsPbBr<sub>3</sub> + AT.

**Table S1.** Time-transient PL spectra fitting of perovskite films on the PEDOT:PSS substrate with various AT ratios.

| AT (ratio) | $\tau_1$ [ns] | $\tau_2$ [ns] | $A_1$ (%) | $A_2$ (%) | $\tau_{\text{avg}}$ [ns] |
|------------|---------------|---------------|-----------|-----------|--------------------------|
| 0 mg/ml    | 3.13          | 36.36         | 32.25     | 67.75     | 25.64                    |
| 4 mg/ml    | 3.60          | 40.29         | 28.22     | 71.78     | 29.94                    |
| 6 mg/ml    | 3.96          | 44.90         | 25.74     | 74.26     | 34.36                    |
| 8 mg/ml    | 3.71          | 41.96         | 27.86     | 72.14     | 31.30                    |

The TRPL decay curves of perovskite films were fitted with a bi-exponential decay function of  $I(t) = A_1 \times \exp[-t/\tau_1] + A_2 \times \exp[-t/\tau_2]$ , where  $A_1$  and  $A_2$  correspond to the decay amplitudes of the curve fitting,  $\tau_1$  and  $\tau_2$  correspond to the decay time constants of the fast and slow processes. The average lifetime  $\tau_{\text{avg}}$  was calculated by  $\tau_{\text{avg}} = (A_1\tau_1 + A_2\tau_2)/(A_1 + A_2)$ .
